# Supplementary material
Source: publisher figshare collection journal article supplement (https://gsapubs.figshare.com/ndownloader/files/39478027)
Supplement: Supplementary file 1 [file 39478027]

## Sheet: Sheet1
TABLE S3 ZIRCON TRACE ELEMENTAL CONTENTS OF THE MAGMATIC ROCKS FROM THE NORTHERN YILI BLOCK
	C15YN19-01	C15YN19-02	C15YN19-03	C15YN19-04	C15YN19-05	C15YN19-06	C15YN19-07	C15YN19-08	C15YN19-09	C15YN19-10	C15YN19-11	C15YN19-12	C15YN19-13	C15YN19-14	C15YN19-15	C15YN19-16	C15YN19-17	C15YN19-18	C15YN19-19
Si	153725	153449	152405	154187	153720	153642	154593	154523	154312	152990	175250	153836	153252	153736	153597	153623	153228	152849	150969
Ti	14.6785	14.3238	6.64044	4.83407	7.21189	82.2523	12.1836	5.04621	13.0198	12.7537	11.2301	5.71263	6.10829	11.5658	10.7599	9.3929	13.8476	8.2033	9.25301
Y	1272.77	899.646	734.732	703.728	920.644	776.374	1095.25	779.974	1285.48	731.729	1777.92	598.311	921.022	784.146	953.763	727.993	1412.47	923.501	977.335
Nb	1.60927	0.822854	1.24203	1.04558	1.17578	1.20404	1.1094	1.05228	0.74892	0.690356	0.96029	0.807125	1.37686	0.953515	1.10772	0.895769	0.616413	1.14859	1.17567
La	1.31362	0.473115	4.79667	3.03483	10.8157	1.72276	2.17834	1.79355	5.70869	0.00293061	2.36452	1.4127	12.671	0.828476	0.0354108	0.910376	0.0118687	10.4668	0.45721
Ce	16.655	8.77843	21.3995	16.0636	34.5732	14.4334	17.1982	13.9583	24.8647	7.77646	11.2007	11.1791	41.0391	9.62174	8.96836	11.7349	9.30864	35.7102	11.0941
Pr	0.485889	0.21839	1.37273	0.847958	3.02777	0.653073	1.0438	0.495819	2.03001	0.033436	0.580477	0.423197	3.51998	0.298588	0.0591276	0.329697	0.137409	3.11262	0.266358
Nd	3.16612	1.76463	6.50816	4.00609	13.4767	3.05111	7.06493	2.3492	10.2228	0.720636	4.18856	1.93515	15.4493	1.99833	1.0658	2.25251	2.73325	13.9589	1.66994
Sm	3.25272	2.504	2.50928	1.85989	4.21909	2.14271	4.33629	1.87755	6.21283	1.60048	6.31898	1.36142	4.7002	2.1553	2.49837	2.02906	5.61434	4.57332	2.62111
Eu	0.608246	0.493422	0.375306	0.312233	0.651952	0.405973	0.814643	0.400007	0.838511	0.403223	1.12899	0.337779	0.73165	0.389688	0.63445	0.377553	1.02675	0.585159	0.497075
Gd	20.2974	14.4059	11.4793	9.06061	14.6636	12.4488	18.5943	10.6241	26.2648	11.9162	33.1275	8.42026	14.0456	12.5402	15.3798	12.0741	29.2818	15.2683	14.3067
Tb	7.04208	5.02931	3.83526	3.17328	4.83581	4.24278	6.37925	3.84994	8.447	4.40949	11.1901	2.98294	4.82653	4.46027	5.18154	4.29019	9.40823	5.31174	5.30294
Dy	91.8154	64.3515	50.6505	44.0898	64.3082	55.9353	81.5837	53.0241	103.85	54.8579	139.894	40.4689	62.4225	58.5757	69.3294	54.1115	114.458	66.9725	71.0054
Ho	35.5811	24.8668	19.9142	18.2176	25.0449	21.5523	30.8972	21.4232	37.4678	20.7551	51.3831	16.4328	24.5056	22.0371	26.6339	20.663	41.2815	25.447	27.6605
Er	173.384	123.618	101.347	99.292	127.377	108.371	149.446	109.264	171.741	98.6981	235.804	82.875	128.293	107.174	132.745	99.6854	187.872	124.904	135.854
Tm	35.697	25.0993	21.5956	22.5839	27.4521	22.8268	30.2014	24.1403	33.7208	19.9852	45.4925	17.9033	28.3295	22.1081	27.333	20.4266	35.8774	25.7373	28.0876
Yb	394.57	274.706	245.484	276.135	311.138	254.764	328.005	280.695	352.739	216.706	474.591	211.474	337.213	238.677	302.49	220.505	369.524	285.887	310.006
Lu	70.5105	49.372	45.5026	54.5753	58.2571	46.5622	58.8528	53.0544	61.0366	38.5641	82.2798	39.9399	65.2692	42.7528	54.7906	39.023	63.143	51.8971	56.1994
Hf	9670.87	8886.37	10299.4	10454.7	9560.77	10074.6	9528.79	10324.3	9533.71	9463.46	8656.5	10649.6	10388.2	9536.42	9144.78	10023	9252.89	10214	9710.92
Ta	0.766403	0.437584	0.687507	0.627263	0.669219	0.607426	0.608183	0.64952	0.469827	0.4133	0.496778	0.520309	0.657147	0.535178	0.61545	0.48178	0.417037	0.636386	0.614603
Th	130.301	59.7231	90.1174	105.994	98.8459	109.135	106.483	123.765	100.763	50.2586	147.876	55.2729	144.305	69.0309	72.6074	67.8795	90.1503	87.6837	73.3917
U	228.061	114.815	183.974	239.54	209.359	213.21	183.836	241.15	142.24	89.0959	179.124	129.945	281.873	135.014	134.579	123.057	120.055	170.05	144.576
REE	854.38	595.68	536.77	553.252	699.841	549.112	736.597	576.949	845.145	476.429	1099.54	437.146	743.017	523.617	647.145	488.413	869.678	669.832	665.028
(Yb/La)N	418.749	809.469	71.3481	126.849	40.1047	206.164	209.92	218.183	86.1424	103089	279.819	208.692	37.1016	401.634	11909	337.673	43404.9	38.0787	945.266
T(C)-Zr(Miller et al., 2003)	775.671	775.671	775.671	775.671	775.671	775.671	775.671	775.671	775.671	775.671	775.671	775.671	775.671	775.671	775.671	775.671	775.671	775.671	775.671
T(C)-Ti	837.326	834.603	755.358	725.843	763.32	1069.88	816.923	729.736	824.107	821.862	808.232	741.153	747.425	811.357	803.725	789.655	830.863	775.993	788.124
Ce4+/Ce3+	25.2523	21.3397	19.5056	30.2429	14.604	25.4038	10.618	36.9923	8.60576	43.6486	8.43654	36.6276	15.9376	21.9455	34.2202	24.2343	9.28642	12.7426	30.134
Eu/Eu*	0.265307	0.291168	0.247837	0.269569	0.293764	0.27859	0.321537	0.317423	0.232643	0.327239	0.276556	0.35358	0.319146	0.265659	0.36275	0.270344	0.28381	0.248185	0.287689
logfO2_[T(C)-Zr]	-13.1218	-13.7423	-14.0727	-12.4631	-15.0895	-13.1035	-16.1772	-11.7227	-16.8966	-11.1448	-16.6707	-11.7702	-14.7797	-13.6343	-12.0268	-13.2769	-16.6491	-15.5746	-12.5209
△FMQ_[T(C)-Zr]	1.12759	0.514577	0.186258	1.78393	-0.837629	1.14775	-1.93152	2.52218	-2.65005	3.11408	-2.56157	2.47977	-0.528422	0.619008	2.22773	0.975833	-2.39506	-1.31924	1.74797
Th melt	118.455	54.2937	81.9249	96.3581	89.8599	99.2135	96.8028	112.514	91.6031	45.6896	134.432	50.2481	131.186	62.7554	66.0067	61.7086	81.9548	79.7124	66.7198
Y melt	606.083	428.403	349.872	335.108	438.402	369.702	521.547	371.416	612.131	348.442	846.629	284.91	438.582	373.403	454.173	346.663	672.606	439.762	465.398
Th/Y	0.195444	0.126735	0.234157	0.287543	0.204971	0.268361	0.185607	0.302932	0.149646	0.131125	0.158785	0.176365	0.299115	0.168064	0.145334	0.178007	0.121847	0.181262	0.143361
SiO2	56.221	53.6667	57.6601	59.6447	56.5751	58.9316	55.8553	60.2168	54.5184	53.8299	54.8582	55.5117	60.0749	55.2031	54.3581	55.5728	53.485	55.6938	54.2848
